# Supplementary material
Source: publisher site journal article supplement (https://www.dovepress.com/article/603823)
Supplement: Supplementary file 1 [file 603823%20Supplemental%20Appendix.docx]

| supplemental appendix:  Table S1. Variable Definitions. | | | |
| --- | --- | --- | --- |
| Variable | Abbreviation | Unit | Definition |
| Age | / | years | Age at ICU admission, calculated from date of birth. |
| Gender | / | / | Male or female, as documented in medical records. |
| Smoking | / | / | Currently smoking, or having quit smoking within 6 months before screening, or having a cumulative smoking history of more than 20 pack‑years. |
| Hospital length of stay. | Hospital LOS | days | Total duration of hospitalization from admission to discharge or death. |
| ICU length of stay. | ICU LOS | days | Total duration of ICU stays from ICU admission to ICU discharge or death. |
| Diabetes mellitus | / | / | Previously diagnosed type 1 or type 2 diabetes, or fasting blood glucose ≥7.0 mmol/L, hemoglobin A1c >6.5%, and requiring glucose‑lowering therapy during hospitalization. |
| Hypertension | / | / | A documented history of hypertension, current diagnosis of hypertension, use of antihypertensive medication, or repeatedly elevated blood pressure meeting diagnostic criteria |
| Cancer | / | / | A documented history or current diagnosis of malignant tumor, including solid tumors and hematologic malignancies. |
| Chronic lung disease | / | / | A documented history or current diagnosis of chronic respiratory disease, including chronic obstructive pulmonary disease, bronchiectasis, interstitial lung disease, chronic asthma, pulmonary fibrosis, or other chronic structural or functional lung disorders. |
| Chronic liver disease | / | / | A documented history or current diagnosis of chronic liver disease, including chronic viral hepatitis, liver cirrhosis, alcoholic liver disease, nonalcoholic fatty liver disease, autoimmune liver disease, or other chronic hepatic disorders. |
| Severe Fever with Thrombocytopenia Syndrome | SFTS | / | A documented diagnosis of SFTS based on compatible clinical manifestations and laboratory confirmation of SFTS virus infection (positive SFTS virus nucleic acid or specific antibodies). |
| Multiple organ dysfunction syndrome | MODS | / | The presence of dysfunction involving two or more organ systems during hospitalization. |
| White blood cell | WBC | ×10⁹/L | White blood cell count was defined as the worst value measured at ICU admission or within the first 24 hours after ICU admission. |
| Neutrophil | Neut% | ×10⁹/L | Neutrophil count was defined as the worst value measured at ICU admission or within the first 24 hours after ICU admission. |
| Lymphocyte | Lymph% | ×10⁹/L | Lymphocyte count was defined as the worst value measured at ICU admission or within the first 24 hours after ICU admission. |
| Platelet | PLT | ×10⁹/L | Platelet count was defined as the worst value measured at ICU admission or within the first 24 hours after ICU admission. |
| Hemoglobin | Hb | g/L | Hemoglobin was defined as the worst value measured at ICU admission or within the first 24 hours after ICU admission. |
| Alanine aminotransferase | ALT | U/L | Alanine aminotransferase was defined as the worst value measured at ICU admission or within the first 24 hours after ICU admission. |
| Aspartate aminotransferase | AST | U/L | Aspartate aminotransferase was defined as the worst serum AST level measured at ICU admission or within the first 24 hours after ICU admission. |
| Lactate dehydrogenase | LDH | U/L | Lactate dehydrogenase was defined as the worst serum LDH level measured at ICU admission or within the first 24 hours after ICU admission. |
| Total bilirubin | TBIL | μmol/L | Total bilirubin was defined as the worst serum total bilirubin level measured at ICU admission or within the first 24 hours after ICU admission. |
| Creatinine | Crea | μmol/L | Creatinine was defined as the worst serum creatinine level measured at ICU admission or within the first 24 hours after ICU admission. |
| Blood urea nitrogen | BUN | mmol/L | Blood urea nitrogen was defined as the worst BUN level measured at ICU admission or within the first 24 hours after ICU admission. |
| Prothrombin time | PT | seconds | Prothrombin time was defined as the worst PT measured at ICU admission or within the first 24 hours after ICU admission. |
| Activated partial thromboplastin time | APTT | seconds | Activated partial thromboplastin time was defined as the worst APTT measured at ICU admission or within the first 24 hours after ICU admission. |
| Fibrinogen | FIB | g/L | Fibrinogen was defined as the worst plasma fibrinogen level measured at ICU admission or within the first 24 hours after ICU admission. |
| D‑Dimer | / | mg/L | D-Dimer was defined as the worst plasma D-Dimer level measured at ICU admission or within the first 24 hours after ICU admission. |
| Iron | / | μmol/L | Iron was defined as the worst serum iron level measured at ICU admission or within the first 24 hours after ICU admission. |
| C‑reactive protein | CRP | mg/L | C-reactive protein was defined as the worst serum CRP level measured at ICU admission or within the first 24 hours after ICU admission. |
| Procalcitonin | PCT | ng/mL | Procalcitonin was defined as the worst serum PCT level measured at ICU admission or within the first 24 hours after ICU admission. |
| CRP/albumin ratio | / | / | CRP/albumin ratio was defined as the worst ratio of C-reactive protein to serum albumin measured at ICU admission or within the first 24 hours after ICU admission. |
| PaCO₂ | / | mmHg | PaCO₂ was defined as the worst arterial partial pressure of carbon dioxide measured by arterial blood gas analysis at ICU admission or within the first 24 hours after ICU admission. |
| PaO₂/FiO₂ | P/F | / | PaO₂/FiO₂ was defined as the worst ratio of arterial partial pressure of oxygen to fraction of inspired oxygen, calculated from arterial blood gas analysis at ICU admission or within the first 24 hours after ICU admission. |
| Lactic acid | Lac | mmol/L | Lactic acid was defined as the worst arterial or venous blood lactate level measured at ICU admission or within the first 24 hours after ICU admission. |
| Admission APACHE II score | / | / | Admission APACHE II score was defined as the Acute Physiology and Chronic Health Evaluation II score calculated at ICU admission or within the first 24 hours after ICU admission. |
| Admission SOFA score | / | / | Admission SOFA score was defined as the Sequential Organ Failure Assessment score calculated at ICU admission or within the first 24 hours after ICU admission. |
| Admission NRS 2002 score | / | / | Admission NRS 2002 score was defined as the Nutritional Risk Screening 2002 score assessed at ICU admission or within the first 24 hours after ICU admission. |
| Mechanical ventilation | MV | / | Mechanical ventilation was defined as the use of invasive or non-invasive mechanical ventilatory support during ICU stay. |
| Duration of MV | / | Hours | Total duration of invasive mechanical ventilation from the time of endotracheal intubation or tracheostomy to extubation or death during the ICU stay. |
| CRRT | / | / | Continuous renal replacement therapy (including CVVH, CVVHD, CVVHDF) during ICU stay. |
| Corticosteroids | / | / | Systemic corticosteroid use equivalent to prednisone ≥0.3 mg/kg/day for ≥3 weeks, either within 3 months before ICU admission or during ICU stay. |

Table S2. Comparison of Baseline Clinical Characteristics Between the Training and Validation Cohorts

| Variable | Classification | Sum  （N=574） | Training  （N=459） | Validation  （N=115） | *P* |
| --- | --- | --- | --- | --- | --- |
| Age, (Year) | / | 66.50(55.00,74.00) | 68.00(56.50,76.50) | 66.00(55.00,73.50) | 0.189 |
| Gender | Female | 221(38.50%) | 43(3739%) | 178(3.878%) | 0.868 |
|  | Male | 353(61.50%) | 72(62.61%) | 281(61.22%) |  |
| Smoking | No | 398(69.34%) | 80(69.57%) | 318(69.28%) | 1 |
|  | Yes | 176(30.66%) | 35(30.43%) | 141(30.72%) |  |
| Hospital LOS, (days) | / | 22.00(13.00,36.00) | 20.00(11.00,34.00) | 23.00(14.00,37.00) | 0.085 |
| ICU LOS, (days) | / | 10.00(5.00,18.00) | 10.00(5.00,18.00) | 10.00(5.00,19.00 | 0.731 |
| Diabetes Mellitus | No | 380(66.20%) | 84(73.04%) | 296(64.49%) | 0.104 |
|  | Yes | 194(33.80%) | 31(26.96%) | 163(35.51%) |  |
| Hypertension | No | 350(60.98%) | 80(69.57%) | 270(58.82%) | 0.045 |
|  | Yes | 224(39.02%) | 35(30.43%) | 189(41.18%) |  |
| Cancer | No | 447(77.87%) | 84(73.04%) | 363(79.08%) | 0.204 |
|  | Yes | 127(22.13%) | 31(26.96%) | 96(20.92%) |  |
| Chronic Lung Disease | No | 548(95.47%) | 110(95.65%) | 438(95.42%) | 1 |
|  | Yes | 26(4.53%) | 5(4.35%) | 21(4.58%) |  |
| Chronic Liver Disease | No | 536(93.38%) | 105(91.30%) | 431(93.90%) | 0.429 |
|  | Yes | 38(6.62%) | 10(8.70%) | 28(6.10%) |  |
| SFTS | No | 536(93.38%) | 106(92.17%) | 430(93.68%) | 0.71 |
|  | Yes | 38(6.62%) | 9(7.83%) | 29(6.32%) |  |
| Covid-19 | No | 513(89.37%) | 102(88.70%) | 411(89.54%) | 0.925 |
|  | Yes | 61(10.63%) | 13(11.30%) | 48(10.46%) |  |
| MODS | No | 367(63.94%) | 71(61.74%) | 296(64.49%) | 0.66 |
|  | Yes | 207(36.06%) | 44(38.26%) | 163(35.51%) |  |
| White blood cell () | / | 11.80(6.33,18.56) | 11.77(5.86,20.28) | 11.82(6.49,18.09) | 0.635 |
| Neutrophil () | / | 10.56(5.54,16.38) | 11.12(5.26,17.73) | 10.50(5.57,16.24) | 0.699 |
| Lymphocyte () | / | 0.62(0.35,0.98) | 0.62(0.36,0.98) | 0.61(0.35,0.96) | 0.84 |
| Platelet () | / | 106.00(53.00,191.00) | 97.00(48.50,204.50) | 108.00(53.00,191.00) | 0.641 |
| Hemoglobin () | / | 103.23(28.71) | 108.03(29.63) | 102.02(28.38) | 0.051 |
| Alanine Aminotransferase () | / | 42.00(20.00,98.00) | 51.00(27.00,103.50) | 39.00(19.00,96.50) | 0.039 |
| Aspartate Aminotransferase () | / | 64.00(30.00,160.75) | 72.00(35.50,153.00) | 61.00(28.00,163.50) | 0.117 |
| Lactate dehydrogenase () | / | 361.00(237.00,558.75) | 365.00(266.00,559.00) | 361.00(230.50,558.50) | 0.186 |
| Total bilirubin () | / | 17.75(10.30,34.92) | 17.60(10.90,45.45) | 17.90(10.05,32.75) | 0.525 |
| Creatinine () | / | 135.50(82.00,247.75) | 142.00(87.00,275.00) | 133.00(82.00,241.50) | 0.52 |
| Blood urea nitrogen ( | / | 13.22(8.72,20.47) | 14.36(9.50,22.92) | 12.88(8.54,20.16) | 0.161 |
| Prothrombin time (seconds) | / | 14.30(12.60,16.60) | 15.10(12.75,18.40) | 14.10(12.60,16.40) | 0.036 |
| Activated partial thromboplastin time (seconds) | / | 32.85(28.42,39.85) | 33.60(28.00,41.60) | 32.80(28.60,39.70) | 0.643 |
| fibrinogen () | / | 3.77(2.50,5.73) | 3.45(2.24,5.22) | 3.85(2.56,5.94) | 0.081 |
| D-Dimer () | / | 5.78(2.70,9.93) | 6.36(3.09,11.50) | 5.71(2.67,9.75) | 0.321 |
| C-reactive protein (m | / | 144.99(63.17,216.17) | 132.61(56.64,192.80) | 146.98(66.40,220.86) | 0.156 |
| Procalcitonin (n | / | 11.05(1.50,43.35) | 10.09(0.98,49.17) | 11.16(1.60,42.20) | 0.825 |
| C-reactive protein albumin ratio | / | 4.99(2.11,7.78) | 4.39(1.85,7.11) | 5.11(2.34,7.83) | 0.204 |
| Iron () | / | 4.20(2.10,10.57) | 4.30(2.20,9.20) | 4.20(2.00,10.95) | 0.71 |
| PaCO2() | / | 31.00(25.55,38.38) | 29.80(25.00,37.30) | 31.20(25.85,38.55) | 0.439 |
| PaO2/FiO2 | / | 250.72(177.43,359.92) | 240.80(178.88,333.00) | 254.00(177.32,367.47) | 0.319 |
| Lactic acid ( | / | 2.50(1.61,5.14) | 2.55(1.66,5.72) | 2.43(1.60,4.72) | 0.571 |
| Admission APACHEII Score | / | 21.00(16.00,25.00) | 22.00(18.00,26.00) | 21.00(16.00,25.00) | 0.022 |
| Admission SOFA Score | / | 9.00(7.00,11.00) | 9.00(7.00,12.00) | 9.00(6.00,11.00) | 0.089 |
| Admission NRS 2002 Score | / | 5.00(4.00,6.00) | 5.00(4.00,7.00) | 5.00(4.00,6.00) | 0.433 |
| Mechanical Ventilation | No | 210(36.59%) | 37(32.17%) | 173(37.69%) | 0.322 |
|  | Yes | 364(63.41%) | 78(67.83%) | 286(62.31%) |  |
| Duration Of MV (hours) | / | 71.00(0.00,251.75) | 86.00(0.00,261.00) | 66.00(0.00,247.00) | 0.363 |
| CRRT | No | 354(61.67%) | 73(63.48%) | 281(61.22%) | 0.735 |
|  | Yes | 220(38.33%) | 42(36.52%) | 178(38.78%) |  |
| Corticosteroids | No | 363(63.24%) | 74(64.35%) | 289(62.96%) | 0.867 |
|  | Yes | 211(36.76%) | 41(35.65%) | 170(37.04%) |  |

Data are presented as n (%) or median (interquartile range, IQR), unless stated otherwise. Abbreviations: LOS, hospital length of stay; SFTS, Severe Fever with Thrombocytopenia Syndrome; COVID-19, Coronavirus Disease 2019; SOFA, Sequential Organ Failure Assessment; APACHE II, Acute Physiology and Chronic Health Evaluation II; NRS 2002, Nutritional Risk Screening 2002; PaO2, arterial partial pressure of oxygen; FiO2, fraction of inspired oxygen, PaCO2, arterial partial pressure of carbon dioxide; MV, Mechanical Ventilation; CRRT, continuous renal replacement therapy.
